# Supplementary material for: Myeloid-derived cullin 3 promotes STAT3 phosphorylation by inhibiting OGT expression and protects against intestinal inflammation
Source: PubMed Central journal article supplement — J Exp Med. 2017 Apr 3;214(4):1093–109. doi: 10.1084/jem.20161105 (PMC5379975; doi:10.1084/jem.20161105), 2017-04-03
Supplement: JEM_20161105_sm.pdf [file JEM_20161105_sm.pdf]

## SUPPLEMENTAL MATERIAL

Li et al., <https://doi.org/10.1084/jem.20161105>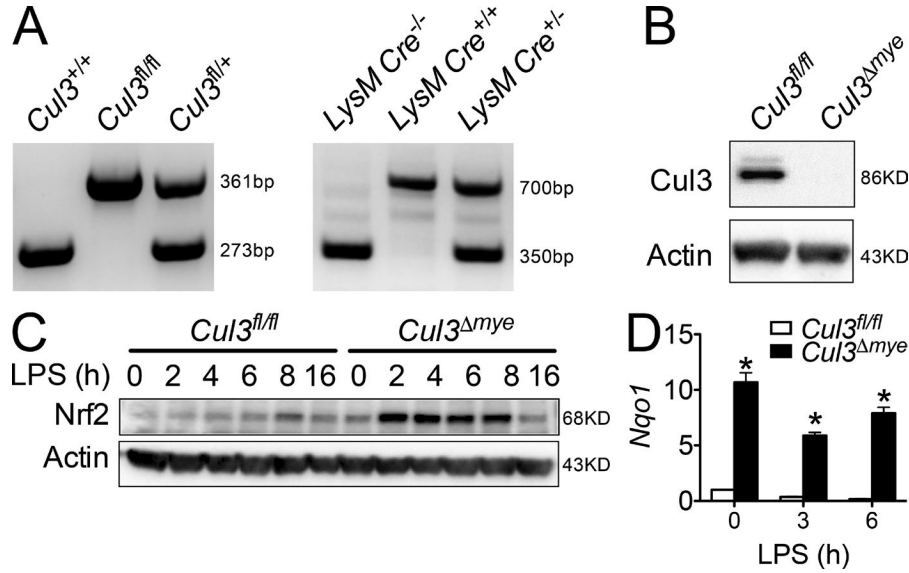

Figure S1. **Generation of myeloid conditional *Cul3* gene deletion mice (*Cul3*<sup>Δmye</sup>).** (A) Genotyping was performed to detect floxed *Cul3* allele (left) or lysosome M-Cre transgene (right). Primers used during genotyping PCR were as follows: for floxed *Cul3* allele, forward 5'-TTAAAAACCGAAAGGCCAG-3' and reverse 5'-CAGCCAAAACAACAAACACAC-3'; for lysosome M-Cre transgene, WT forward 5'-TTACAGTCGGCCAGGCTGAC-3', transgene forward 5'-CCCAGAAATGCCAGATTACG-3', and common reverse 5'-CTGGGCTGCCAGAATTCTC-3'. (B) Immunoblotting was performed to detect CUL3 protein in *Cul3*<sup>fl/fl</sup> and *Cul3*<sup>Δmye</sup> BMMs. (C and D) *Cul3*<sup>fl/fl</sup> and *Cul3*<sup>Δmye</sup> BMMs were left untreated or stimulated with LPS for the indicated periods. (C) Immunoblotting was performed to detect Nrf2 protein. (D) RT-PCR was performed to detect *Nqo1* transcript. Data are representative of three independent experiments, and *Nqo1* transcript levels are expressed as mean ± SD. \* P, < 0.05 versus controls.

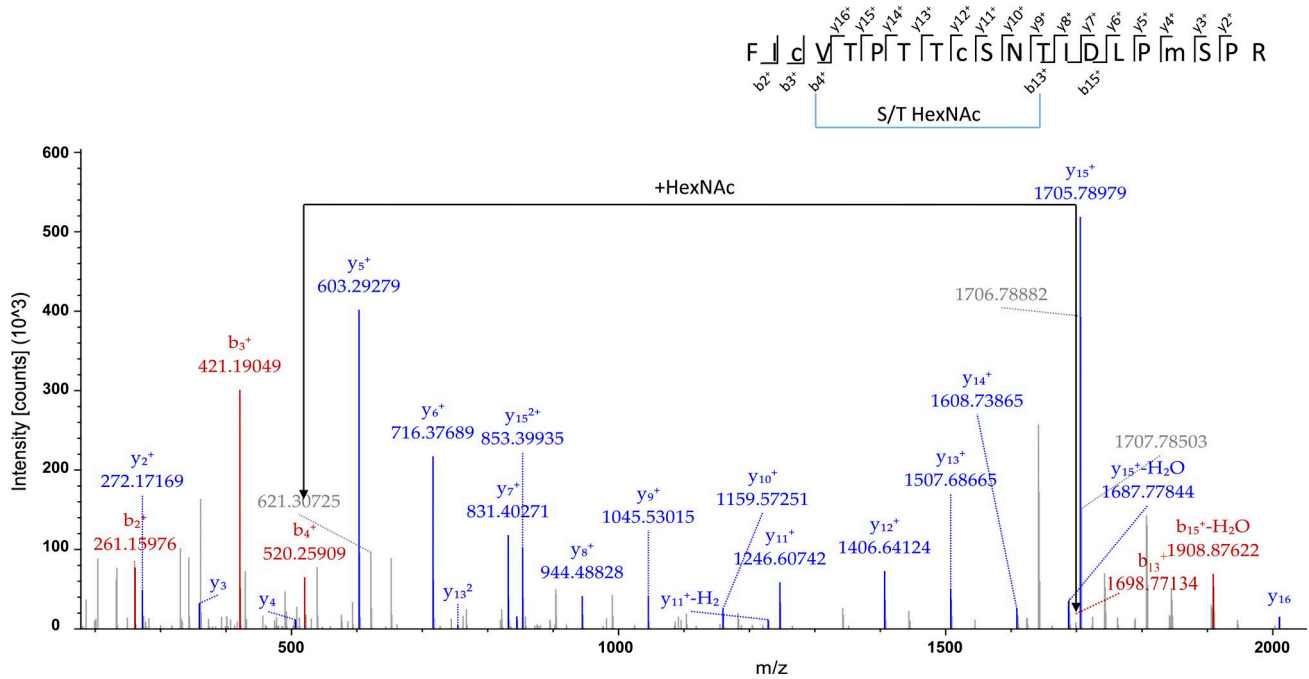

Figure S2. **MS analysis of STAT3 O-GlcNAcylation in mouse BMMs.** Total STAT3 was immunoprecipitated from  $60 \times 10^6$  mouse BMMs left untreated or treated with 200 ng/ml LPS for 6 h. LC-MS/MS analysis was performed as described in Fig. 4.

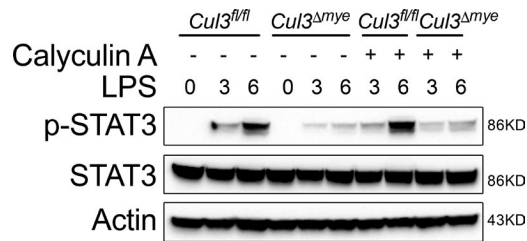

Figure S3. **PP1 is not responsible for the defective STAT3 phosphorylation in *Cul3<sup>Δmye</sup>* macrophages.** *Cul3<sup>fl/fl</sup>* and *Cul3<sup>Δmye</sup>* BMMs were left untreated or stimulated with LPS for 3 or 6 h with or without the pretreatment with 2 nM PP1 inhibitor calyculin A. STAT3 phosphorylation (Y705) was assayed by immunoblotting.

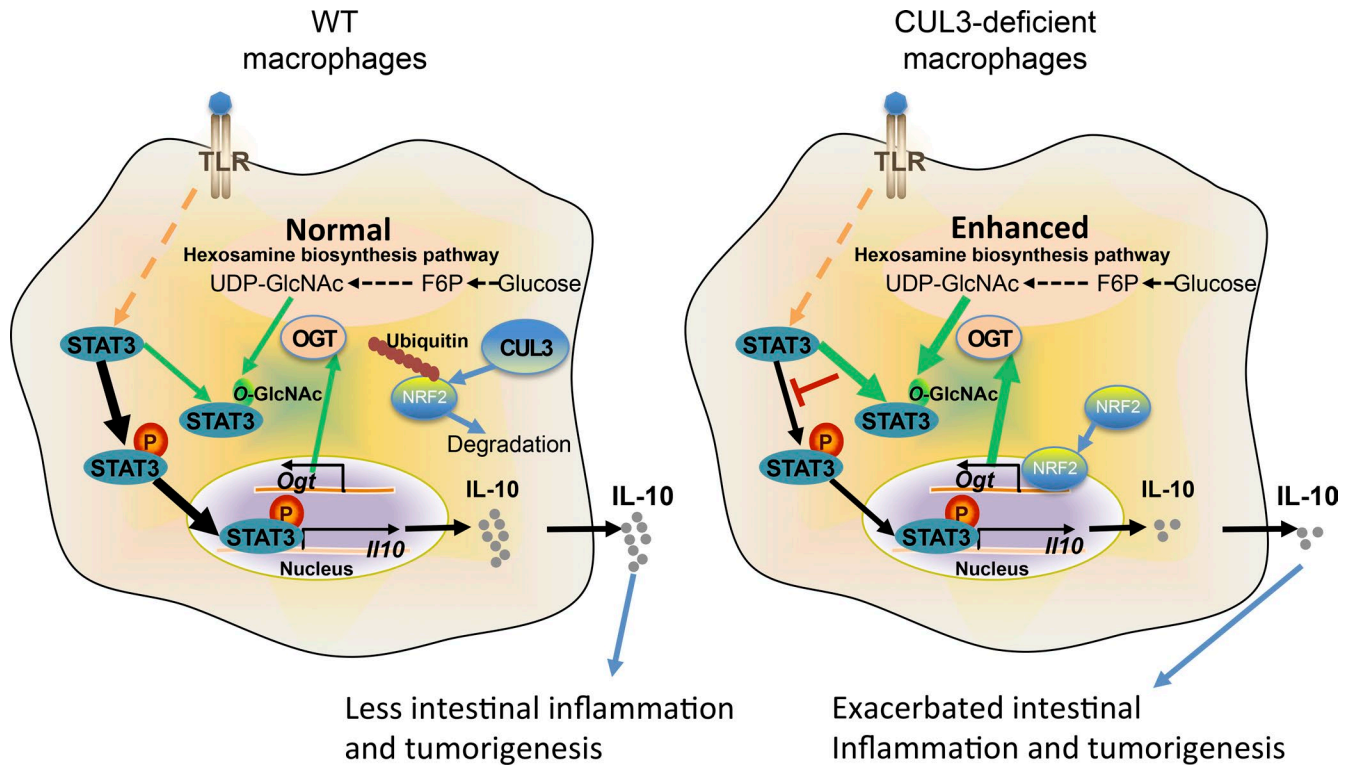

Figure S4. **Schematic of CUL3-Nrf2 signaling-modulated OGT expression and STAT3 O-GlcNAcylation on STAT3 phosphorylation and IL-10 production in macrophages.** In WT macrophages, CUL3 serves as a critical E3 ubiquitin ligase for Nrf2 protein ubiquitination and degradation. CUL3 deficiency results in elevated Nrf2 protein, which subsequently causes enhanced *Ogt* transcription. Therefore, OGT-mediated O-GlcNAcylation of STAT3 on T717 is enhanced in CUL3-deficient macrophages, which intrinsically inhibits STAT3 phosphorylation and IL-10 production and exacerbates disease severity in chemically induced colitis and CAC.

Table S1. Sequences of RT-PCR primers

| Mouse genes  | Forward (5'-3')       | Reverse (5'-3')       |
|--------------|-----------------------|-----------------------|
| <i>Il10</i>  | CCCTTTGCTATGGTGCCTT   | TGGTTTCTCTCCCAAGACC   |
| <i>Il12a</i> | GAGGACTTGAAGATGTACCAG | TCCTATCTGTGTGAGGAGGGC |
| <i>Cxcl1</i> | CTGGGATTCACCTCAAGAAC  | GAAGCCAGCGTTCACCAGAC  |
| <i>Cxcl2</i> | AGTTTGCCTTGACCCTGAAGC | AGGCTCCTCTTTCCAGG     |
| <i>Ogt</i>   | TTCGGGAATCACCTACTTCA  | TACCATCATCCGGGCTCAA   |
| <i>Nqo1</i>  | AGGATGGGAGGTAICTGAATC | AGGCGTCCTTCTTATATGCTA |
| <i>Actb</i>  | AGGGCTATGCTCTCCCTCAC  | CTCTCAGCTGTGGTGGTGAA  |

Table S2. Primers used for site-directed mutagenesis

| Mutation sites | Forward (5'-3')                | Reverse (5'-3')               |
|----------------|--------------------------------|-------------------------------|
| T714A          | GTTTATCTGTGTGGCACCAACGACCTG    | CAGGTCGTTGGTCCACACAGATAAAC    |
| T716A          | CTGTGTGACACCAGCGACCTGCAGCAATAC | GTATTGCTGCAGGTCGCTGGTGTACACAG |
| T717A          | CTGTGTGACACCAACGGCCTGCAGCAATAC | GTATTGCTGCAGGCCGTTGGTGTACACAG |
| T721A          | GCAGCAATGCCATTGACCTGC          | GGTCAATGGCATTGTCTGCAGG        |
| T714/717A      | CATCTGTGTGGCACCAACGGCCTGCAGC   | GCTGCAGGCCGTTGGTCCACACAGATG   |
| T714/716/717A  | CATCTGTGTGGCACCAACGGCCTGCAGC   | GCTGCAGGCCGTTGGTCCACACAGATG   |

Tables S3 and S4 are included as separate Excel files. Table S3 shows the list of genes with increased and decreased expression levels in LPS-treated *Cul3*<sup>Δmye</sup> macrophages compared with similarly treated WT macrophages. Table S4 shows the list of metabolites in LPS-treated *Cul3*<sup>Δmye</sup> macrophages versus similarly treated WT macrophages.
